# Supplementary material for: A randomized, controlled, multicenter trial of the effects of antithrombin on disseminated intravascular coagulation in patients with sepsis
Source: PubMed Central journal article supplement (PMC4057033; doi:10.1186/cc13163), 2013-12-16
Supplement: cc13163-S1.pdf [file cc13163-S1.pdf]

Additional file 1 Background diseases of the patients

---

|                              | Control | Antithrombin | p Value |
|------------------------------|---------|--------------|---------|
| <hr/>                        |         |              |         |
| External causes              |         |              |         |
| Trauma                       | 1       | 2            |         |
| Burn                         | 2       | 2            |         |
| Poisoning                    | 0       | 1            |         |
| Environmental hazard         | 0       | 2            |         |
| Others                       | 1       | 1            |         |
| Internal causes              |         |              |         |
| Central nervous system       | 5       | 1            |         |
| Cardiovascular system        | 1       | 1            |         |
| Respiratory system           | 4       | 5            |         |
| Gastrointestinal system      | 8       | 3            |         |
| Urogenital system            | 5       | 8            |         |
| Metabolism and endocrinology | 0       | 1            |         |
| Other                        | 3       | 3            |         |
|                              |         |              | 0.524   |

---
