# Supplementary material for: A randomized, controlled, multicenter trial of the effects of antithrombin on disseminated intravascular coagulation in patients with sepsis
Source: PubMed Central journal article supplement (PMC4057033; doi:10.1186/cc13163), 2013-12-16
Supplement: cc13163-S2.pdf [file cc13163-S2.pdf]

Additional file 2 Sites of infection and microbial types

|                         | Control | Antithrombin | p Value |
|-------------------------|---------|--------------|---------|
| Positive blood culture  | 7       | 4            |         |
| Central nervous system  | 2       | 1            |         |
| Respiratory tract       | 5       | 12           |         |
| Abdomen                 | 7       | 3            |         |
| Soft tissue             | 2       | 2            |         |
| Urogenital tract        | 5       | 7            |         |
| Other                   | 2       | 1            | 0.390   |
| Gram-negative bacterium | 15      | 14           |         |
| Gram-positive bacterium | 9       | 11           |         |
| Anaerobic bacterium     | 1       | 1            |         |
| Fungus                  | 1       | 0            |         |
| Mixed infection         | 1       | 2            |         |
| Other                   | 1       | 0            |         |
| Unknown                 | 2       | 2            | 0.861   |
