# Supplementary material for: A randomized, controlled, multicenter trial of the effects of antithrombin on disseminated intravascular coagulation in patients with sepsis
Source: PubMed Central journal article supplement (PMC4057033; doi:10.1186/cc13163), 2013-12-16

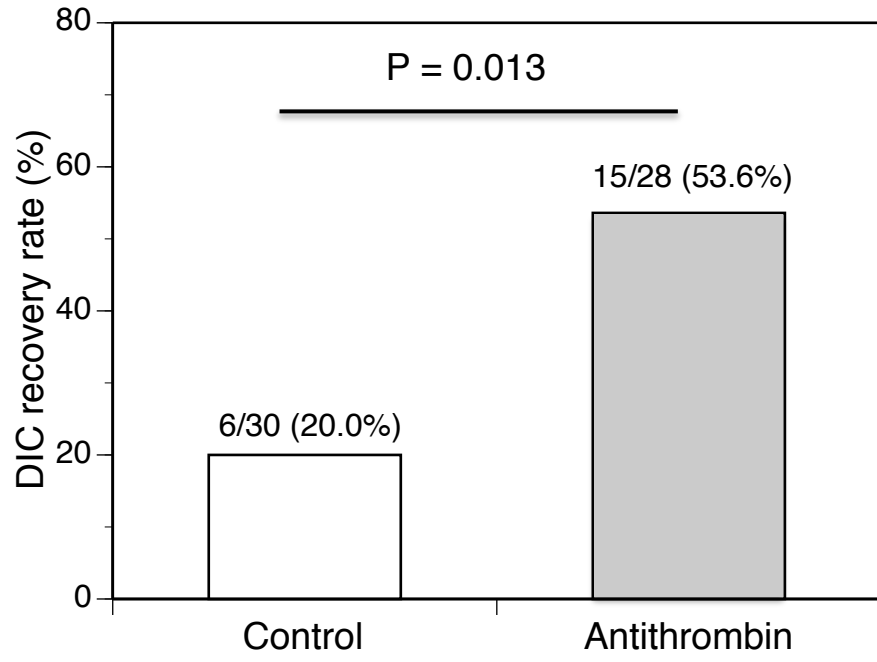

Supplement: cc13163-S4.pdf [file cc13163-S4.pdf]
